# Supplementary material for: TiO2@h-CeO2: a composite yolk–shell microsphere with enhanced photodegradation activity
Source: Royal Society of Chemistry journal article supplement (doi:10.1039/c6cy00466k), 2016-01-01
Supplement: c6cy00466k1.pdf [file c6cy00466k1.pdf]

## **TiO<sub>2</sub>@h-CeO<sub>2</sub>: a composite yolk-shell microsphere with enhanced photodegradation activity**

Bing Yuan, Yu Long\*, Li Wu, Kun Liang, He Wen, Sha Luo, Hongfei Huo, Honglei Yang and Jiantai Ma\*

### **Supporting Information**

#### **Synthesis of anatase spheres and h-CeO<sub>2</sub> spheres**

The anatase spheres and h-CeO<sub>2</sub> spheres were prepared for contrast test, and their synthesis routes were shown in Scheme 1.

##### **Synthesis of anatase nanosphere**

At first, the resulting TP spheres were dispersed in the ethanol water mixture (12 mL, 2:1 by volume) and NH<sub>3</sub>·H<sub>2</sub>O (0.2 mL). Then, the mixture was sealed within a Teflon-lined autoclave (20 mL) and kept at 160°C for 16 h. At last, anatase spheres were acquired by centrifugation, washing with ethanol, and calcination at 550°C for 2 h.

##### **Synthesis of h-CeO<sub>2</sub> nanosphere**

**Synthesis of SiO<sub>2</sub> template** Monodisperse SiO<sub>2</sub> spheres were prepared by a slightly modified Stöber process. Briefly, TEOS (4.5 mL) was rapidly injected into a solution of ethanol (62 mL), H<sub>2</sub>O (25 mL), and NH<sub>3</sub>·H<sub>2</sub>O (1.5 mL), then kept stirring for 2 h.

After centrifugation and washed with ethanol, the obtained spheres were dried at 50°C.

**Synthesis of SiO<sub>2</sub>@CeO<sub>2</sub>@SiO<sub>2</sub> sphere and h-CeO<sub>2</sub> catalyst** The synthesis procedure of SiO<sub>2</sub>@CeO<sub>2</sub>@SiO<sub>2</sub> spheres was same with the preparation procedure of TP@SiO<sub>2</sub>@CeO<sub>2</sub>@SiO<sub>2</sub>, but with SiO<sub>2</sub> spheres in place of TP@SiO<sub>2</sub>. After the acquirement of SiO<sub>2</sub>@CeO<sub>2</sub>@SiO<sub>2</sub>, this light yellow powder was calcined at 900°C for 2 h. Then, NaOH etching treatment described before was carried out again.

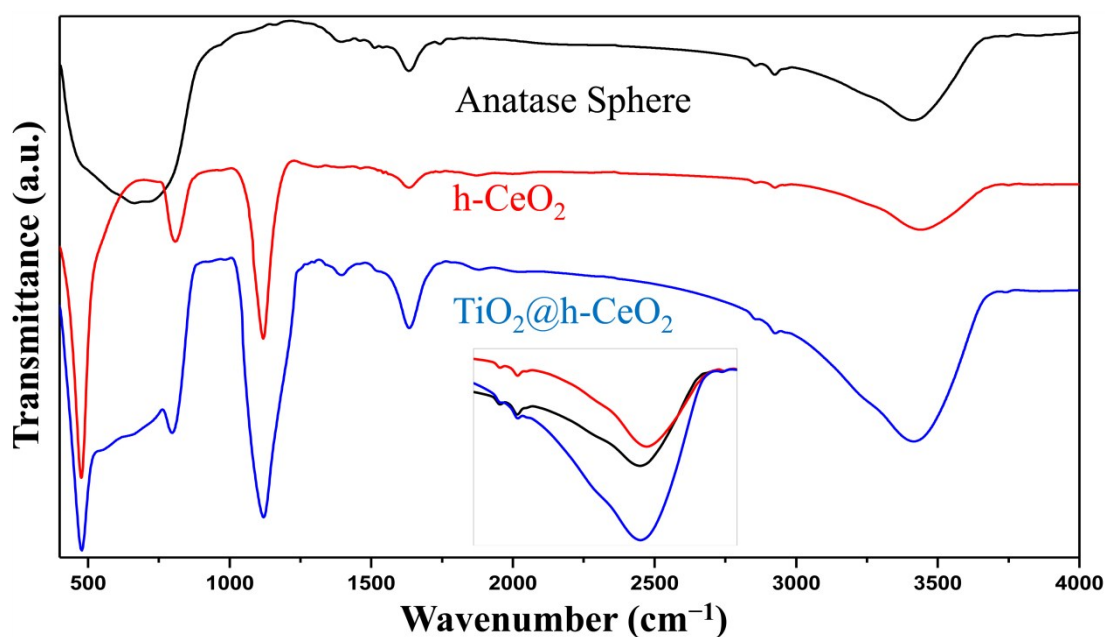

**Fig. S1** FT-IR spectra of anatase sphere, h-CeO<sub>2</sub>, and TiO<sub>2</sub>@h-CeO<sub>2</sub>. All three samples were dried at 80°C overnight. The assignments of the stretching vibration bands of Ce-O-Ce and Si-O-Si were about 480 and 1120 cm<sup>-1</sup>. And the Ti-O-Ti band was observed at a broad absorption from 500 to 800 cm<sup>-1</sup>. The peaks around 3400 cm<sup>-1</sup> were due to the -O-H stretching vibrations. The insert image was an enlargement of -O-H stretching vibrations.

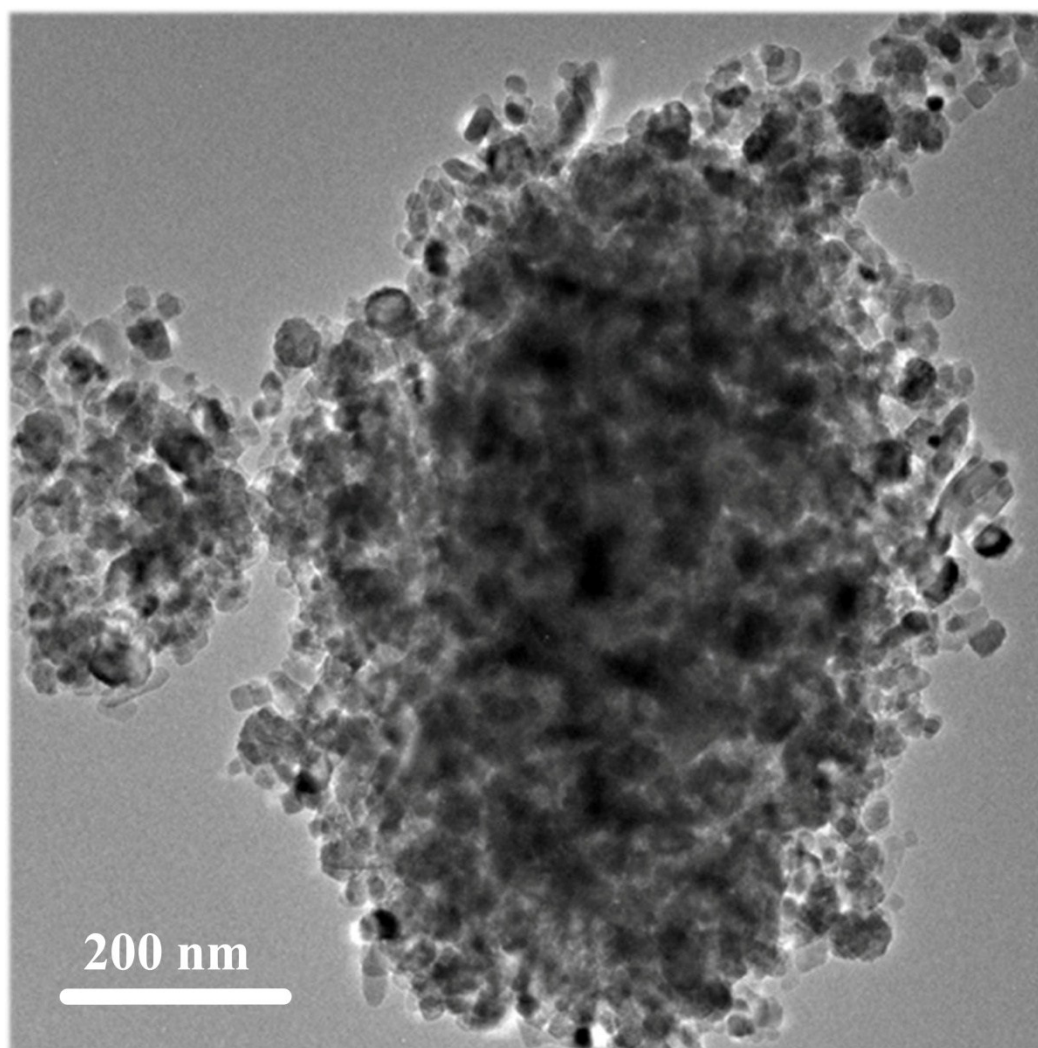

**Fig. S2** TEM images of CeO<sub>2</sub> coated TP.

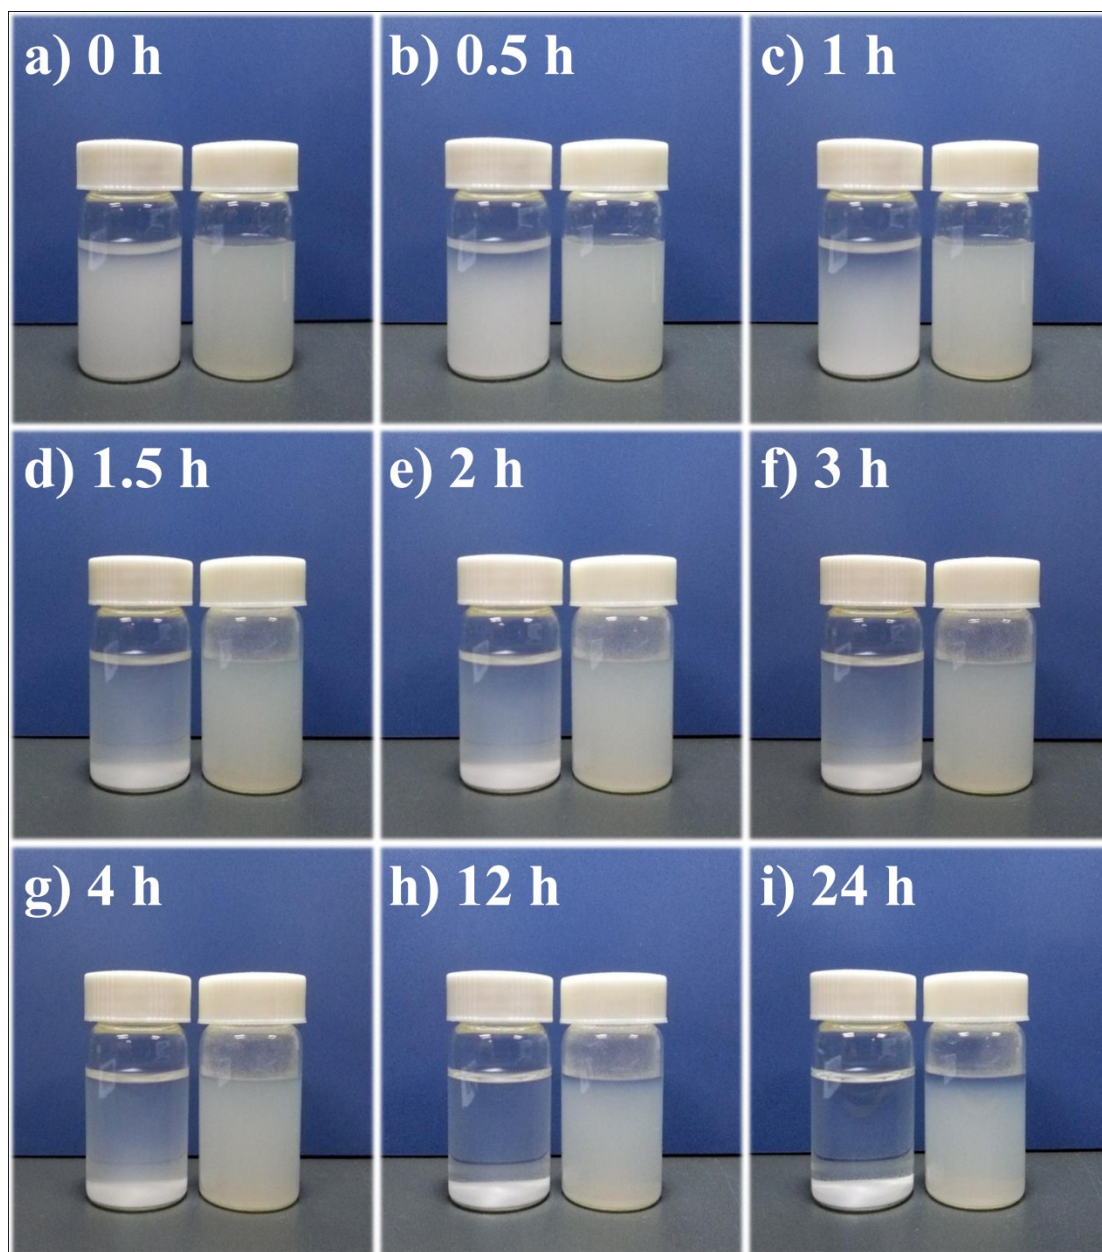

**Fig. S3** Images of anatase sphere (left) and  $\text{TiO}_2@\text{h-CeO}_2$  (right) suspensions kept steady for different times. The contents of both materials were 1 mg/ mL. And the suspensions were treated with ultrasonication for 30 min before kept steady.

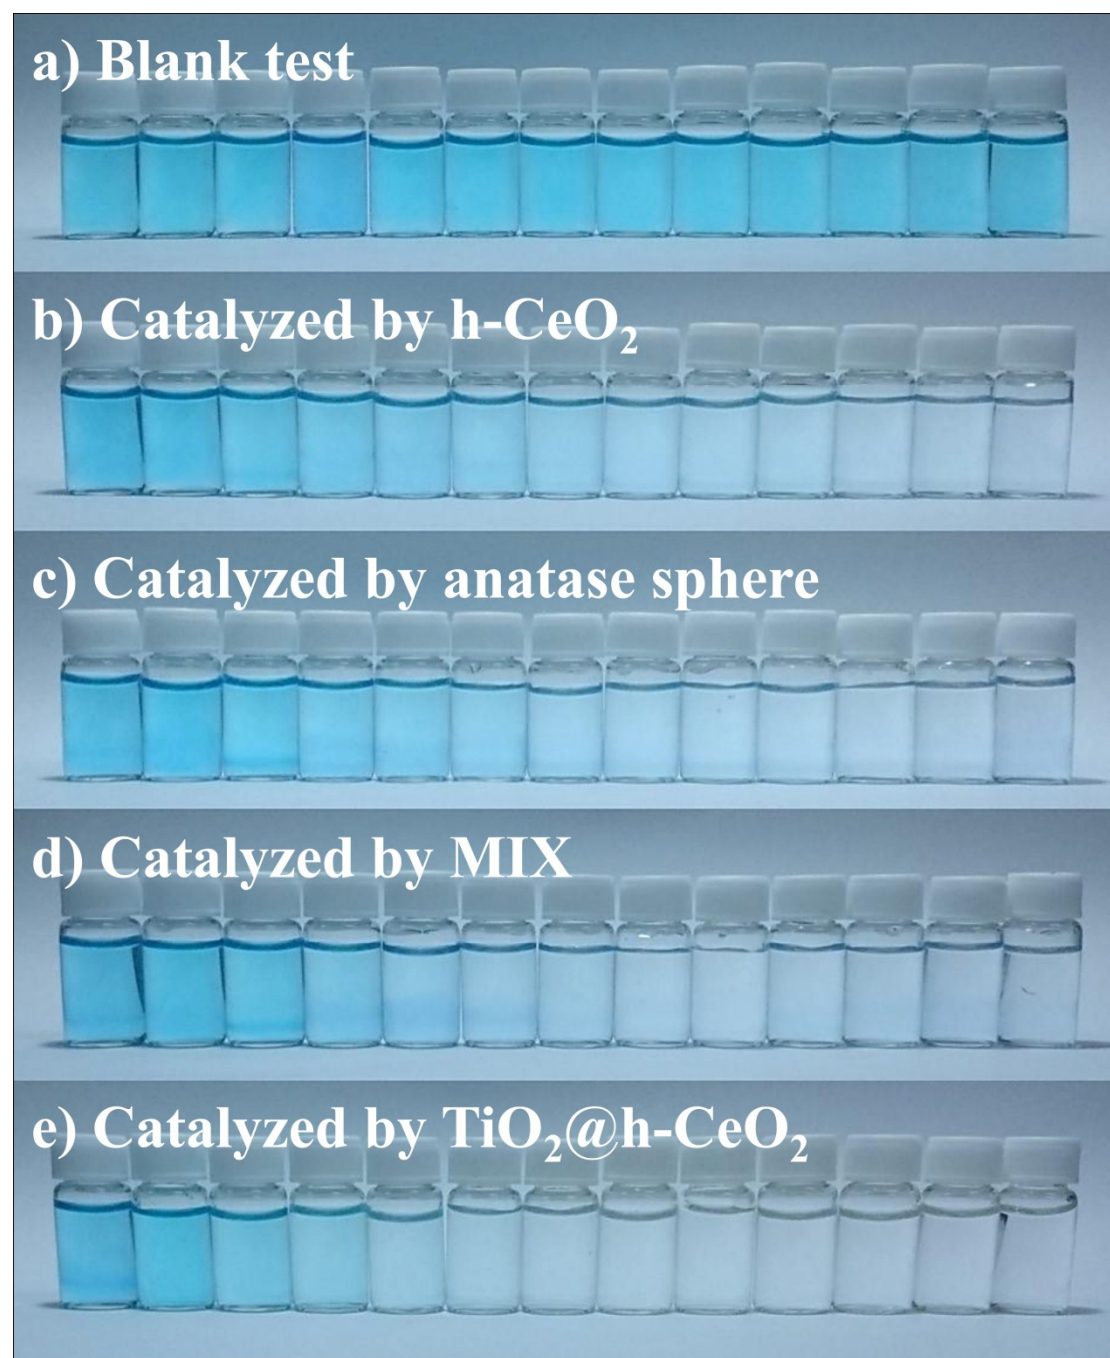

**Fig. S4** The images of color variations during photodegradation of MB.

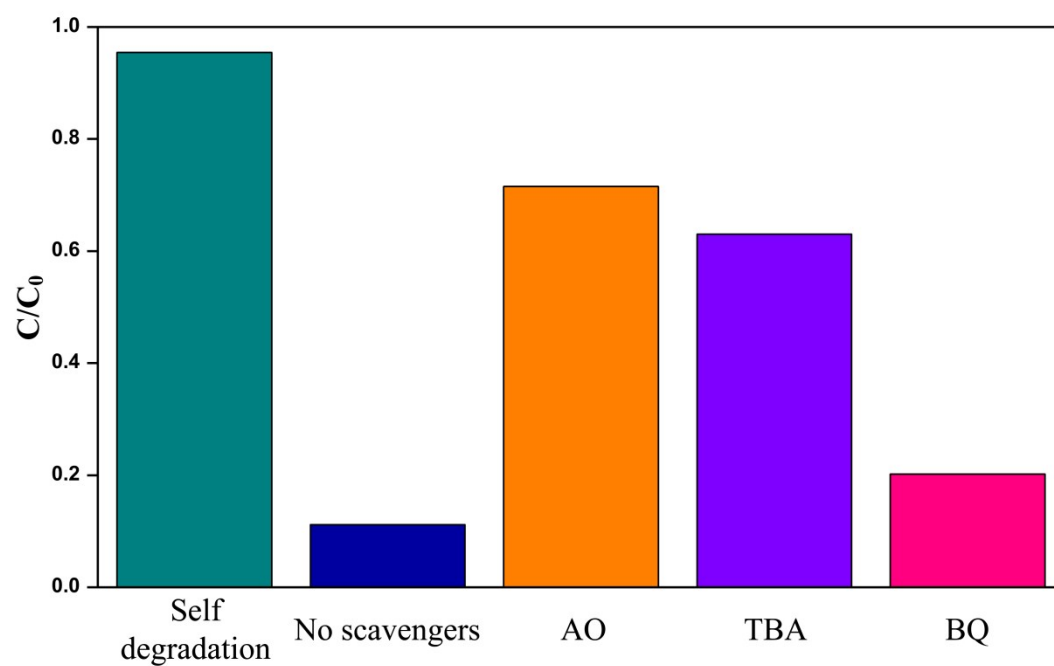

**Fig. S5** Trapping experiment of active species during the photocatalytic degradation with 20 min high-pressure mercury lamp irradiation.
